# Supplementary material for: Ligand functionalization of defect-engineered Ni-MOF-74
Source: Royal Society of Chemistry journal article supplement (doi:10.1039/d2ra06587h), 2022-01-01
Supplement: d2ra06587h1.pdf [file d2ra06587h1.pdf]

# Ligand Functionalization of Defect-Engineered Ni-MOF-74

Jaewoong Lim,<sup>‡</sup> Seonghwan Lee,<sup>‡</sup> Amitosh Sharma, Junmo Seong, Seung Bin Baek\* and

Myoung Soo Lah\*

Department of Chemistry, Ulsan National Institute of Science and Technology, Ulsan 44919,  
Korea

E-mail: sbbaek@unist.ac.kr; mslah@unist.ac.kr

## **Experimental section**

### **General procedure**

The reagents were purchased from commercial sources and used without further purification. Powder X-ray diffraction (PXRD) patterns were recorded using a Bruker D2 Phaser automated diffractometer at room temperature with a step size of  $2\theta = 0.02^\circ$ . Solution-state  $^1\text{H}$  nuclear magnetic resonance (NMR) spectra of acid digested samples in DMSO- $d_6$ , DCl (35%), and  $\text{D}_2\text{SO}_4$  were recorded using a Bruker 400 MHz FT-NMR spectrometer at the UNIST Central Research Facilities. The  $^1\text{H}$  chemical shifts were referenced to the residual proton resonance of the DMSO- $d_6$  solvent in ppm. Thermogravimetric analysis (TGA) was performed using an STD Q-600 series instrument (TA Instruments Inc.) at a heating rate of  $10\text{ }^\circ\text{C min}^{-1}$  under an  $\text{N}_2$  flow.

### **Gas adsorption measurements**

Samples in amount of 20–40 mg were pretreated at  $150\text{ }^\circ\text{C}$  under vacuum for 24 h prior to gas adsorption measurements.  $\text{N}_2$  adsorption/desorption isotherms were measured at 77 K using a BELSORP-Max (BEL Japan, Inc.) low-pressure adsorption measuring system employing a standard volumetric technique up to saturation pressure. The adsorption data in the pressure range of  $< 0.1 P/P_0$  were fitted to the Brunauer–Emmett–Teller (BET) equation to determine the BET surface area using the BELMaster software (BEL Japan).  $\text{CO}_2$  adsorption/desorption isotherms were recorded using the BELSORP-Max adsorption measuring system equipped with a temperature control unit. For all defect-engineered Ni-MOF-74 derivatives, the  $\text{CO}_2$  adsorption isotherms were measured at 273 K up to 1 bar. For the defect-engineered derivatives selected for isosteric heat of adsorption ( $Q_{st}$ ) calculations,  $\text{CO}_2$  adsorption isotherms were recorded at 273 K, 283 K, and 293 K, respectively. All adsorption data were manipulated with BEL-Master software provided by BEL Japan Inc.

### **Calculation of the Isosteric heat of adsorption**

Virial equation (1) was employed to calculate the isosteric heat of adsorption ( $Q_{st}$ ) for  $\text{CO}_2$  in the defect-engineered Ni-MOF-74.<sup>S1</sup>

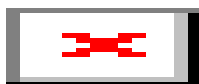

In equation (1),  $p$  is the pressure of the gas phase at equilibrium (kPa),  $N$  is the adsorbed amount per mass of adsorbent ( $\text{mmol g}^{-1}$ ),  $T$  is the absolute temperature (K),  $a_i$  and  $b_j$  are virial coefficients, and  $m$  and  $n$  represent the number of coefficients required to adequately fit the isotherms. The coverage-dependent isosteric heat of adsorption  $Q_{st}$  was evaluated using equation (2).

$$Q_{st} = -R \sum_{i=0}^m a_i N^i \quad (2)$$

In equation (2),  $R$  is the universal gas constant ( $8.314 \text{ J K}^{-1} \text{ mol}^{-1}$ ). The virial coefficients were derived by fitting the experimental adsorption isotherms ( $\ln p$  versus  $N$ ) measured at 273 K, 283 K, and 293 K. The fitted parameter values are presented in Electronic Supplementary Information (ESI).

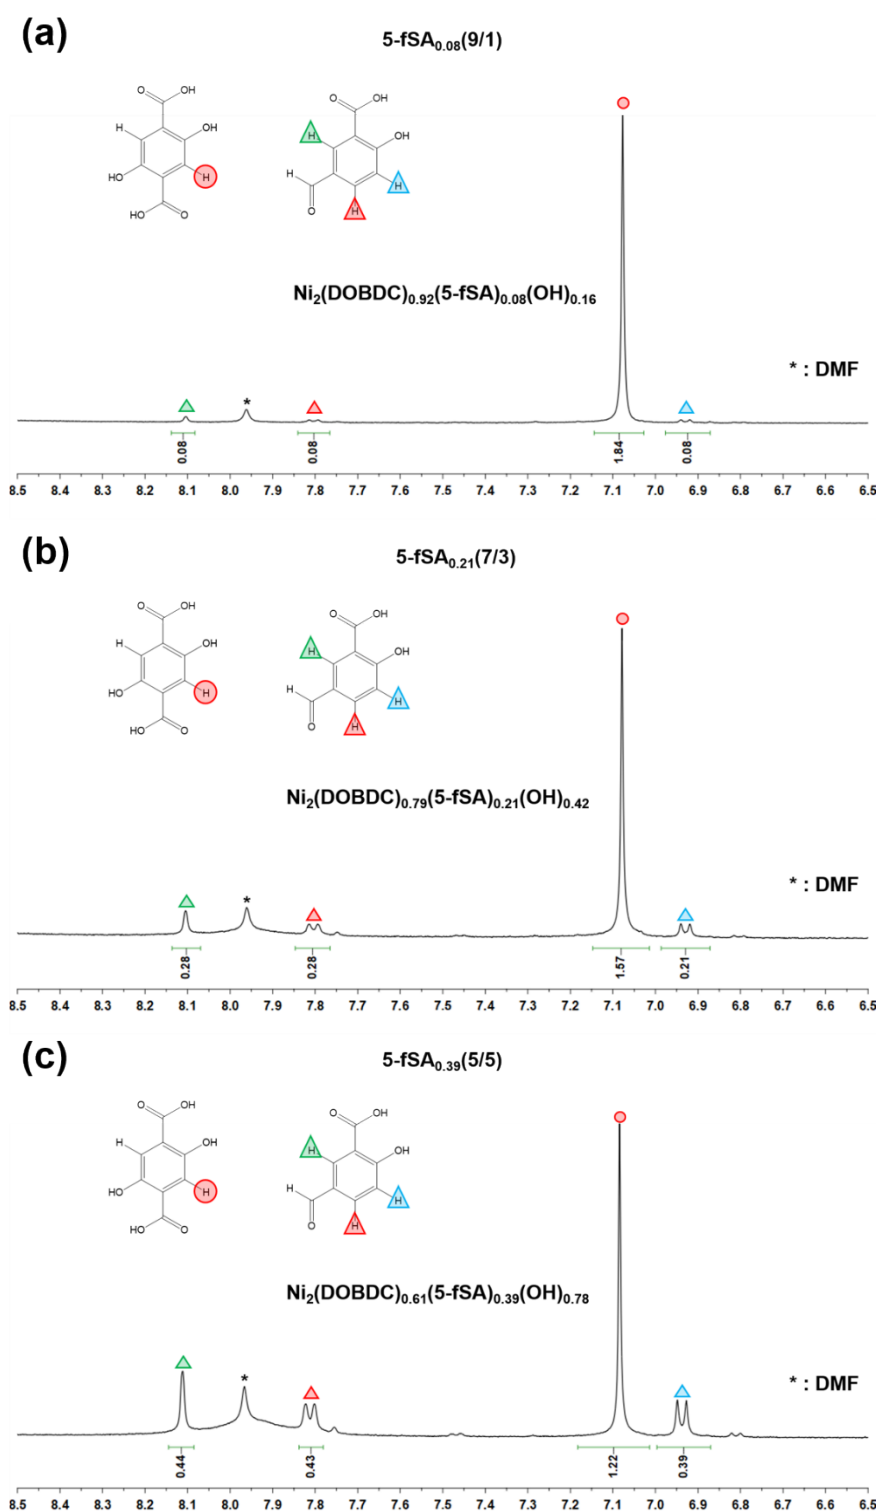

**Figure S1.**  $^1\text{H}$  NMR spectra of acid digested  $5\text{-fSA}_x(\text{a/b})$ . (a)  $5\text{-fSA}_{0.08}(9/1)$ , (b)  $5\text{-fSA}_{0.21}(7/3)$ , and (c)  $5\text{-fSA}_{0.39}(5/5)$ . In  $5\text{-fSA}_x(\text{a/b})$ ,  $x$  is the estimated molar fraction of the fragmented ligand,  $\text{H}_2\text{-5-fSA}$ , in the framework from the  $^1\text{H}$  NMR spectrum, and  $\text{a/b}$  is the molar ratio of  $\text{H}_4\text{DOBDC}$  and  $\text{H}_2\text{-5-fSA}$  used to prepare the defect-engineered Ni-MOF-74.

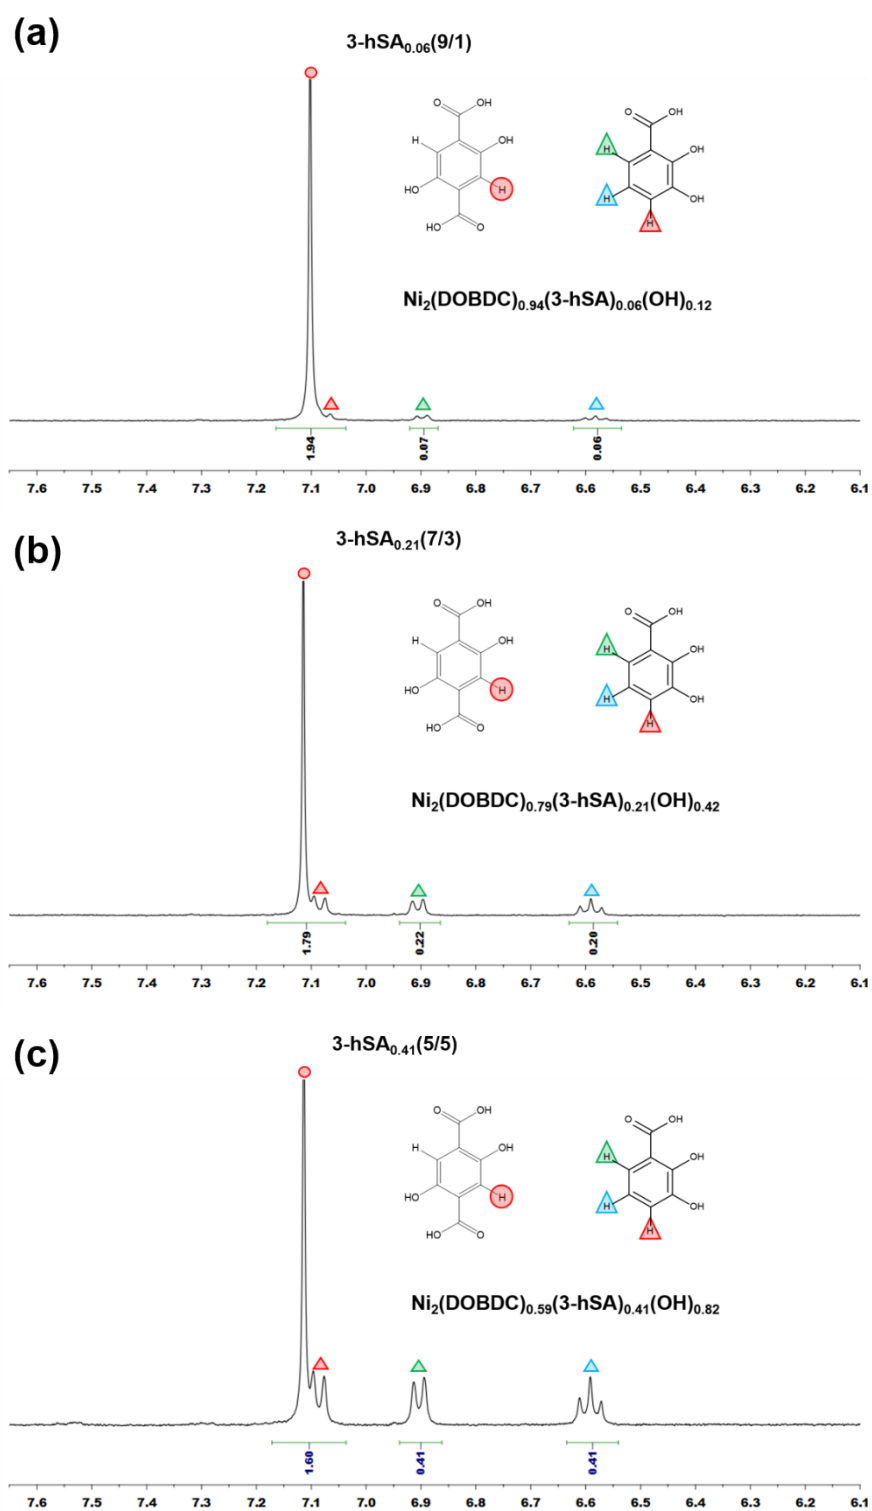

**Figure S2.**  $^1\text{H}$  NMR spectra of acid digested  $3\text{-hSA}_x$ . (a)  $3\text{-hSA}_{0.06}(9/1)$ , (b)  $3\text{-hSA}_{0.21}(7/3)$ , and (c)  $3\text{-hSA}_{0.41}(5/5)$ .

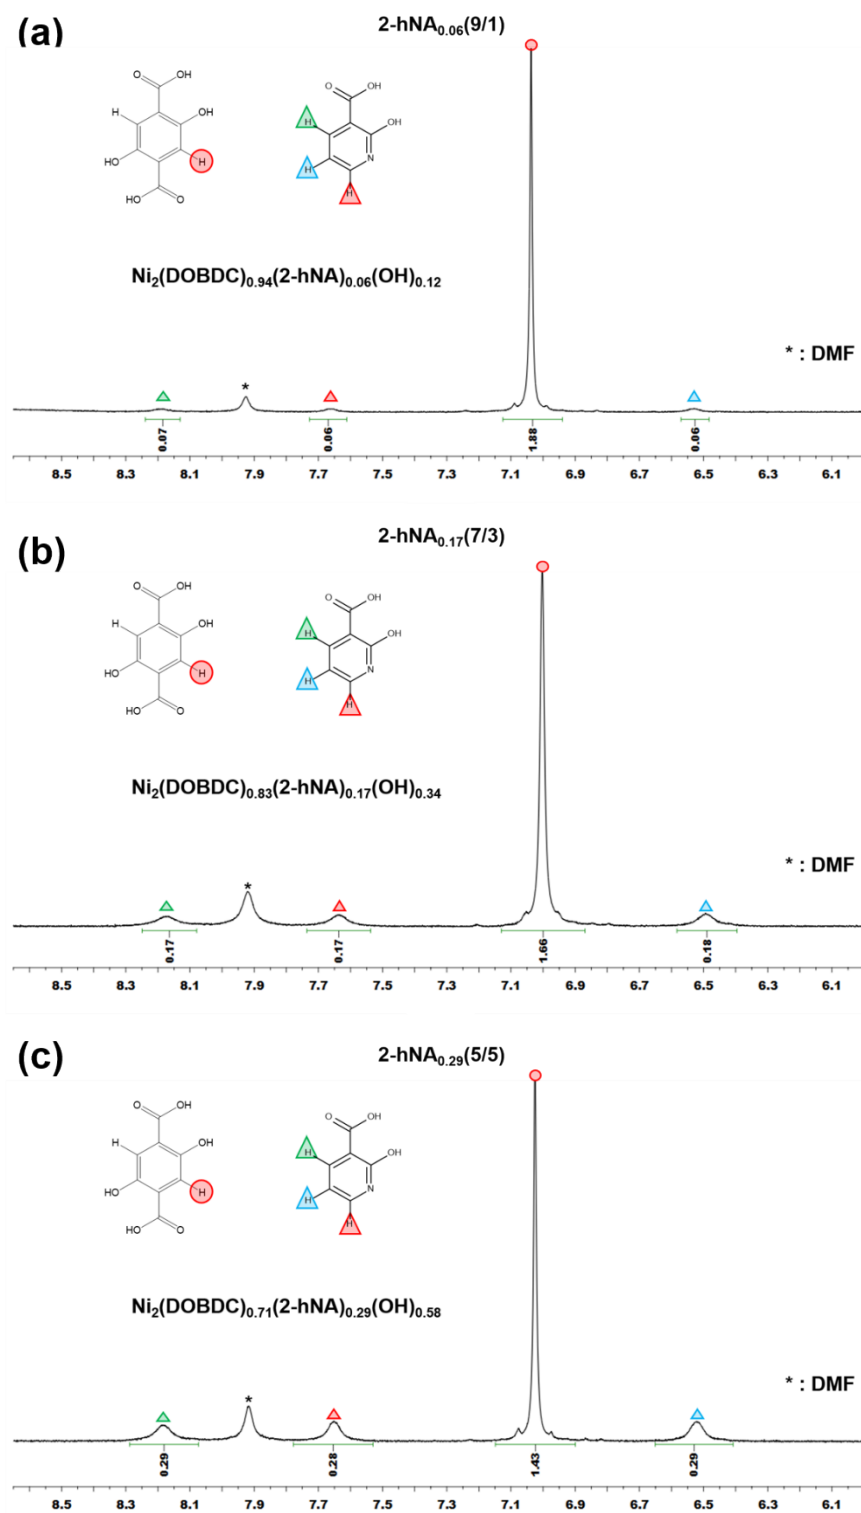

**Figure S3.** <sup>1</sup>H NMR spectra of acid digested  $2\text{-hNA}_x$ . (a)  $2\text{-hNA}_{0.06}(9/1)$ , (b)  $2\text{-hNA}_{0.17}(7/3)$ , and (c)  $2\text{-hNA}_{0.29}(5/5)$ .

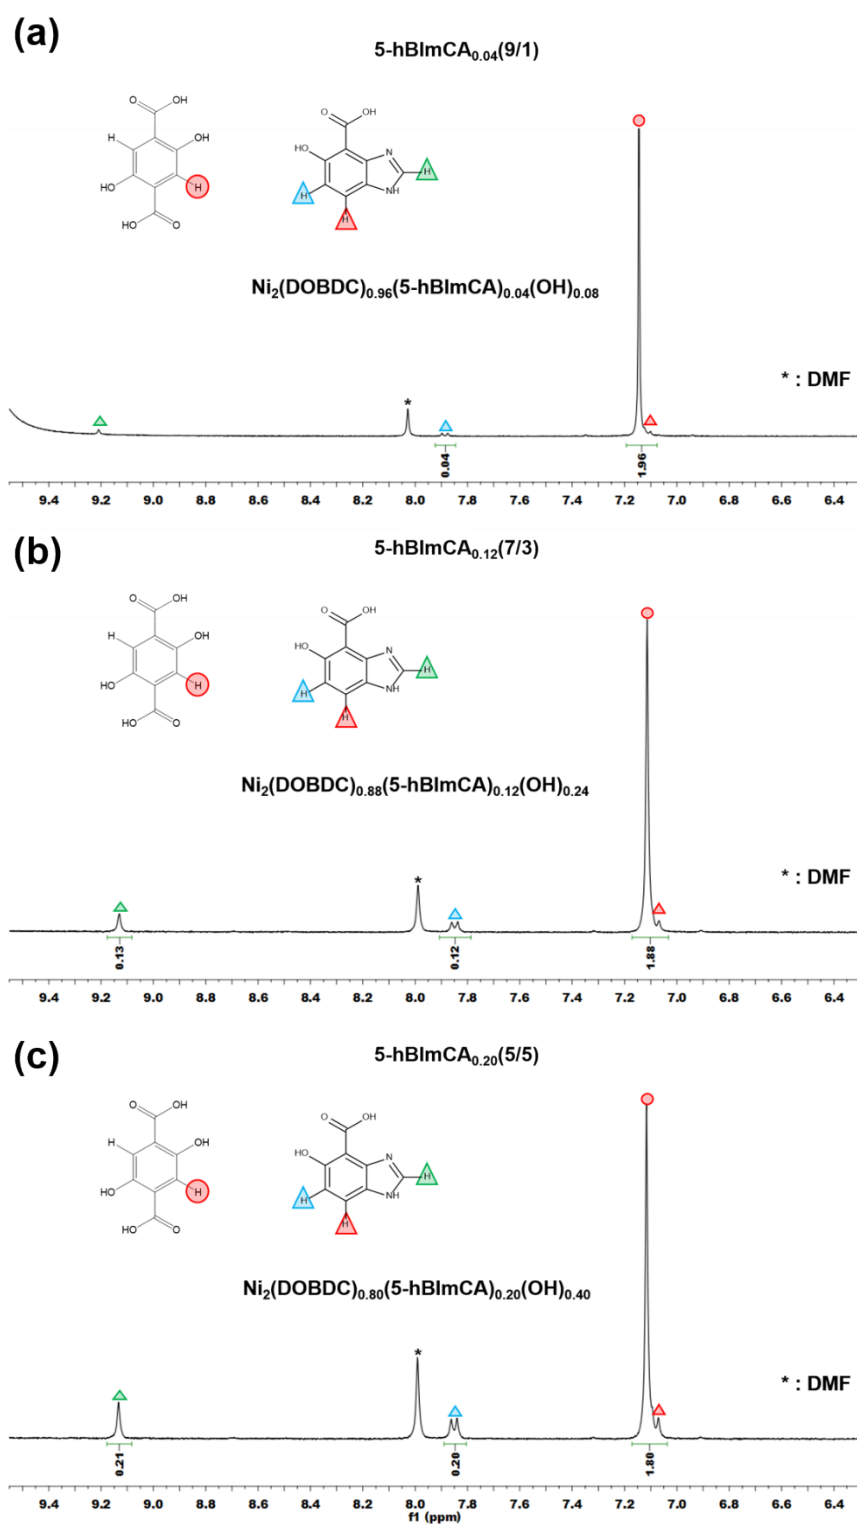

**Figure S4.**  $^1\text{H}$  NMR spectra of acid digested **5-hBImCA<sub>x</sub>**. (a) **5-hBImCA<sub>0.04</sub>(9/1)**, (b) **5-hBImCA<sub>0.12</sub>(7/3)**, and (c) **5-hBImCA<sub>0.20</sub>(5/5)**.

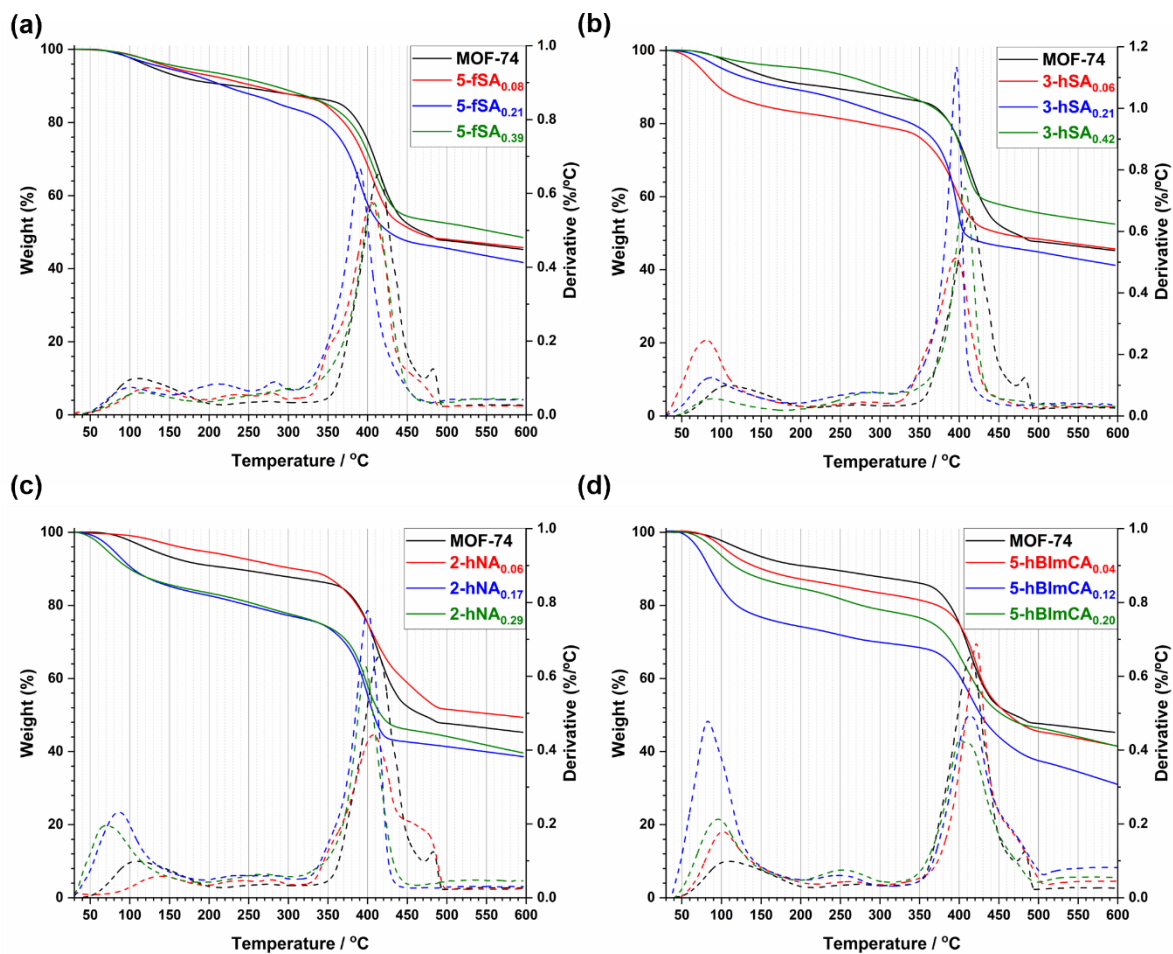

**Figure S5.** Thermogravimetric analysis of defect-engineered Ni-MOF-74. (a) 5-fSA<sub>x</sub>, (b) 3-hSA<sub>x</sub>, (c) 2-hNA<sub>x</sub>, and (d) 5-hBlmCA<sub>x</sub>.



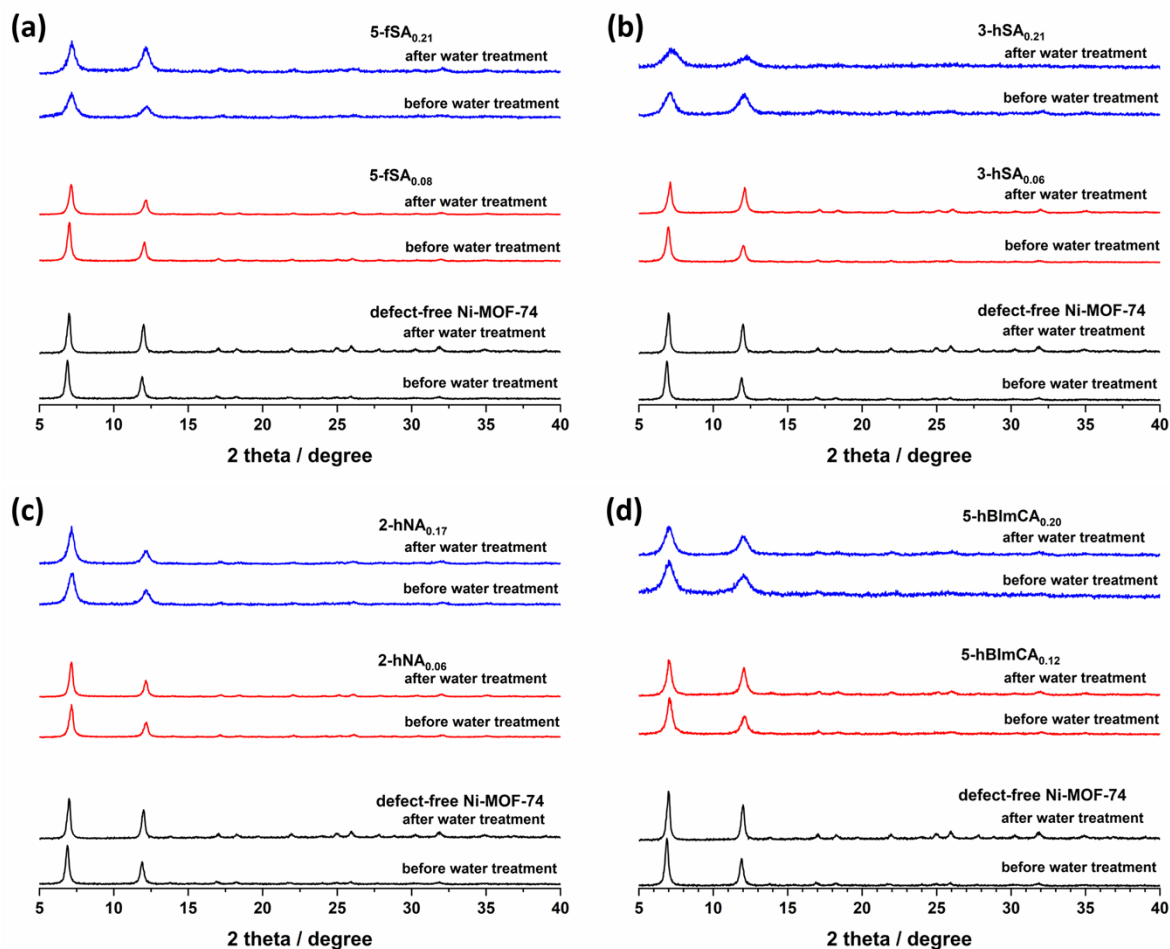

**Figure S6.** Comparison of PXRD patterns for defect-engineered Ni-MOF-74 before and after exposure to boiling water for 3 days. (a)  $5\text{-fSA}_x$ , (b)  $3\text{-hSA}_x$ , (c)  $2\text{-hNA}_x$ , and (d)  $5\text{-hBlmCA}_x$ .

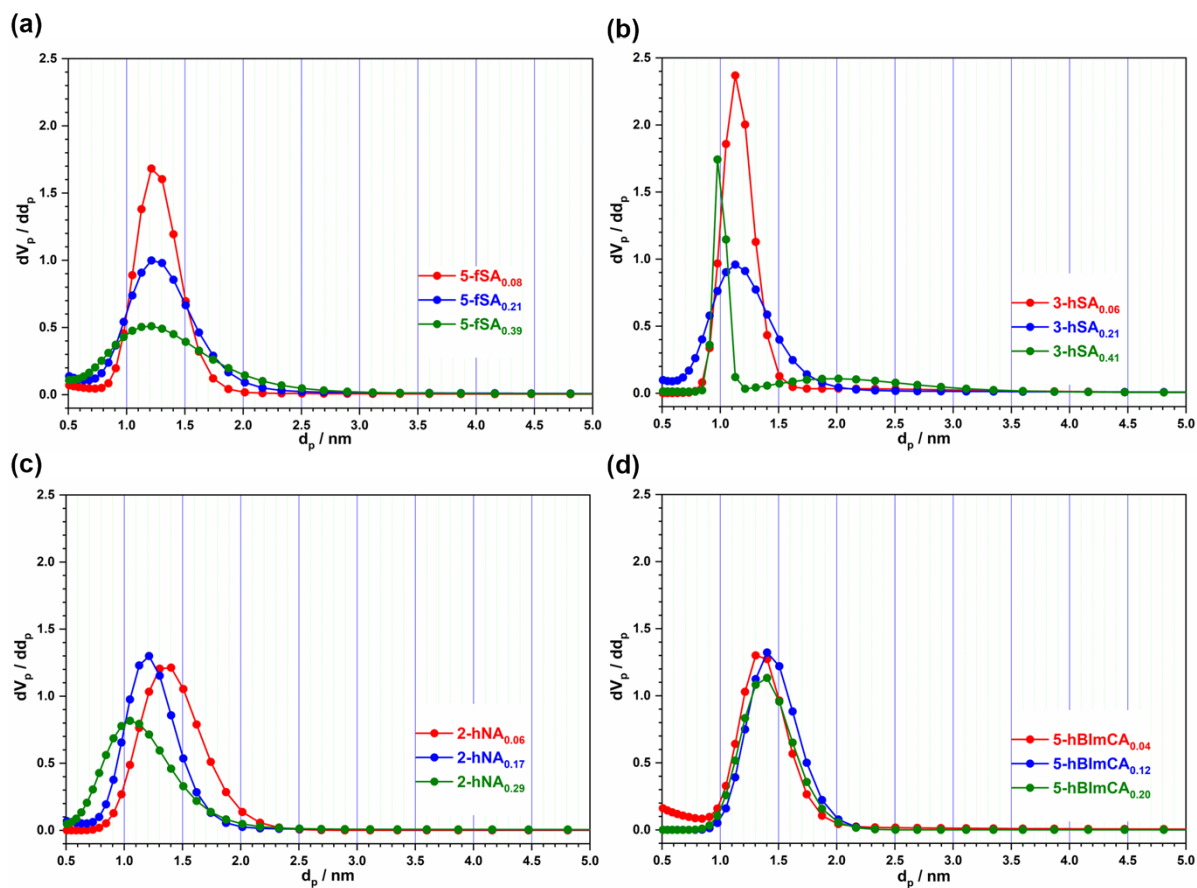

**Figure S7.** Nonlocal density functional theory (NLDFT) pore-size distribution of (a) 5-fSA<sub>x</sub>, (b) 3-hSA<sub>x</sub>, (c) 2-hNA<sub>x</sub>, and (d) 5-hBlmCA<sub>x</sub>.

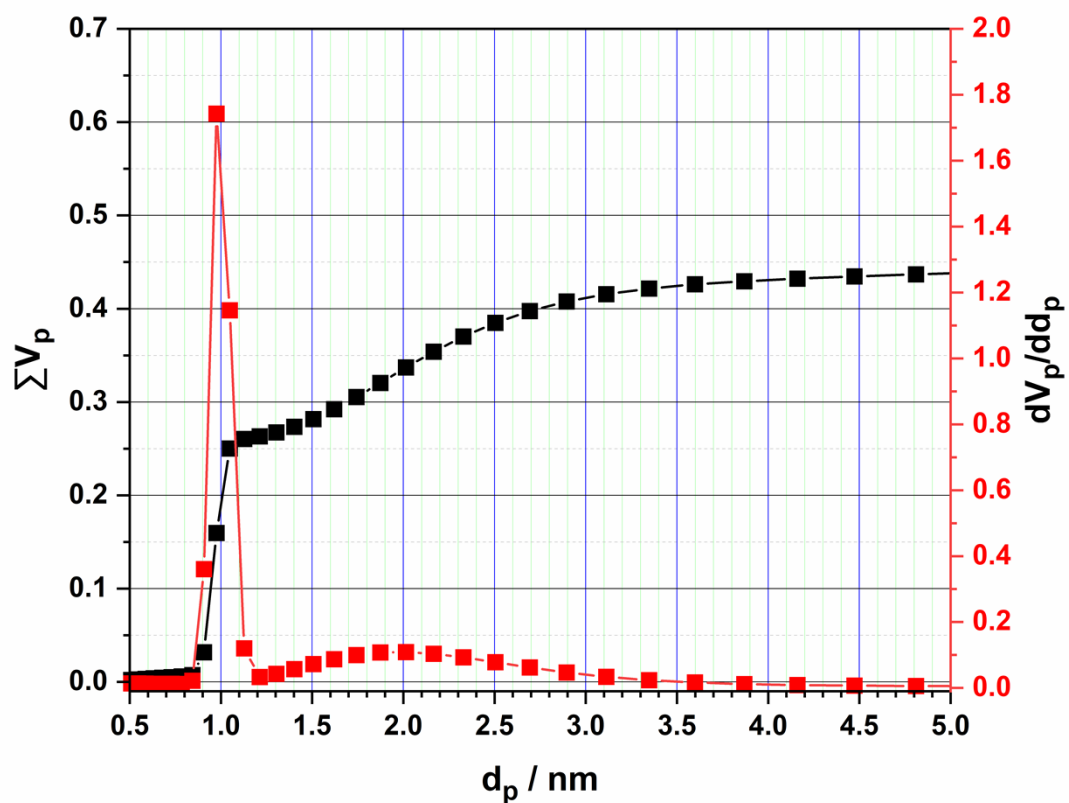

**Figure S8.** Nonlocal density functional theory (NLDFT) pore-size distribution and cumulative pore volume of **3-hSA<sub>0.41</sub>**. The black line and squares represent the cumulative pore volume, and the red line and squares represent the pore-size distribution.

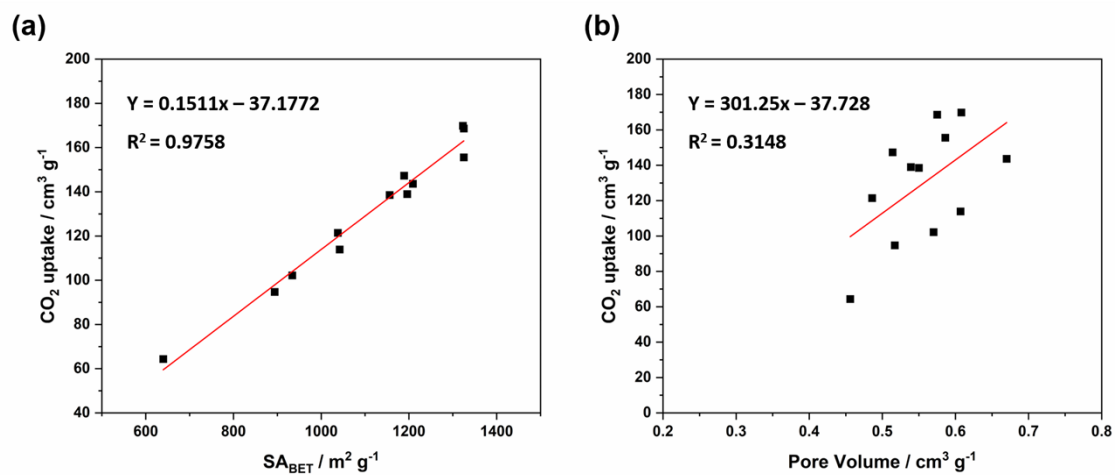

**Figure S9.** The overall correlation of CO<sub>2</sub> uptakes with (a) surface areas and (b) pore volumes of defect-engineered Ni-MOF-74 derivatives.

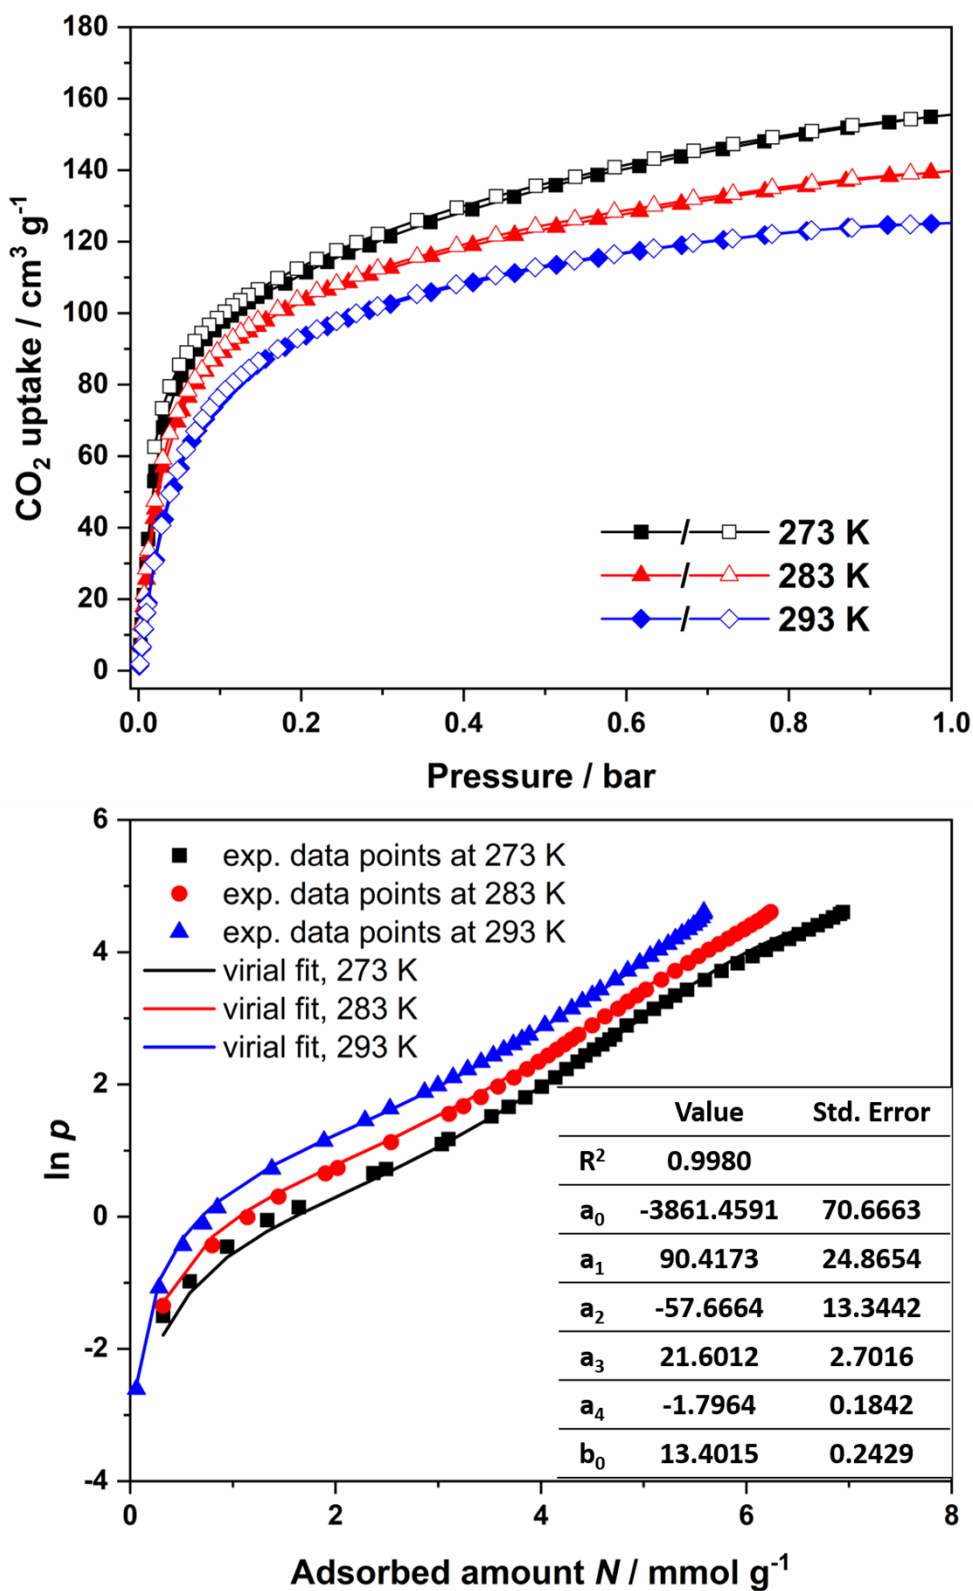

**Figure S10.** (a) CO<sub>2</sub> sorption isotherms of 5-fSA<sub>0.08</sub> recorded at 273 K, 283 K, and 293 K. (b) virial analysis of isotherms.

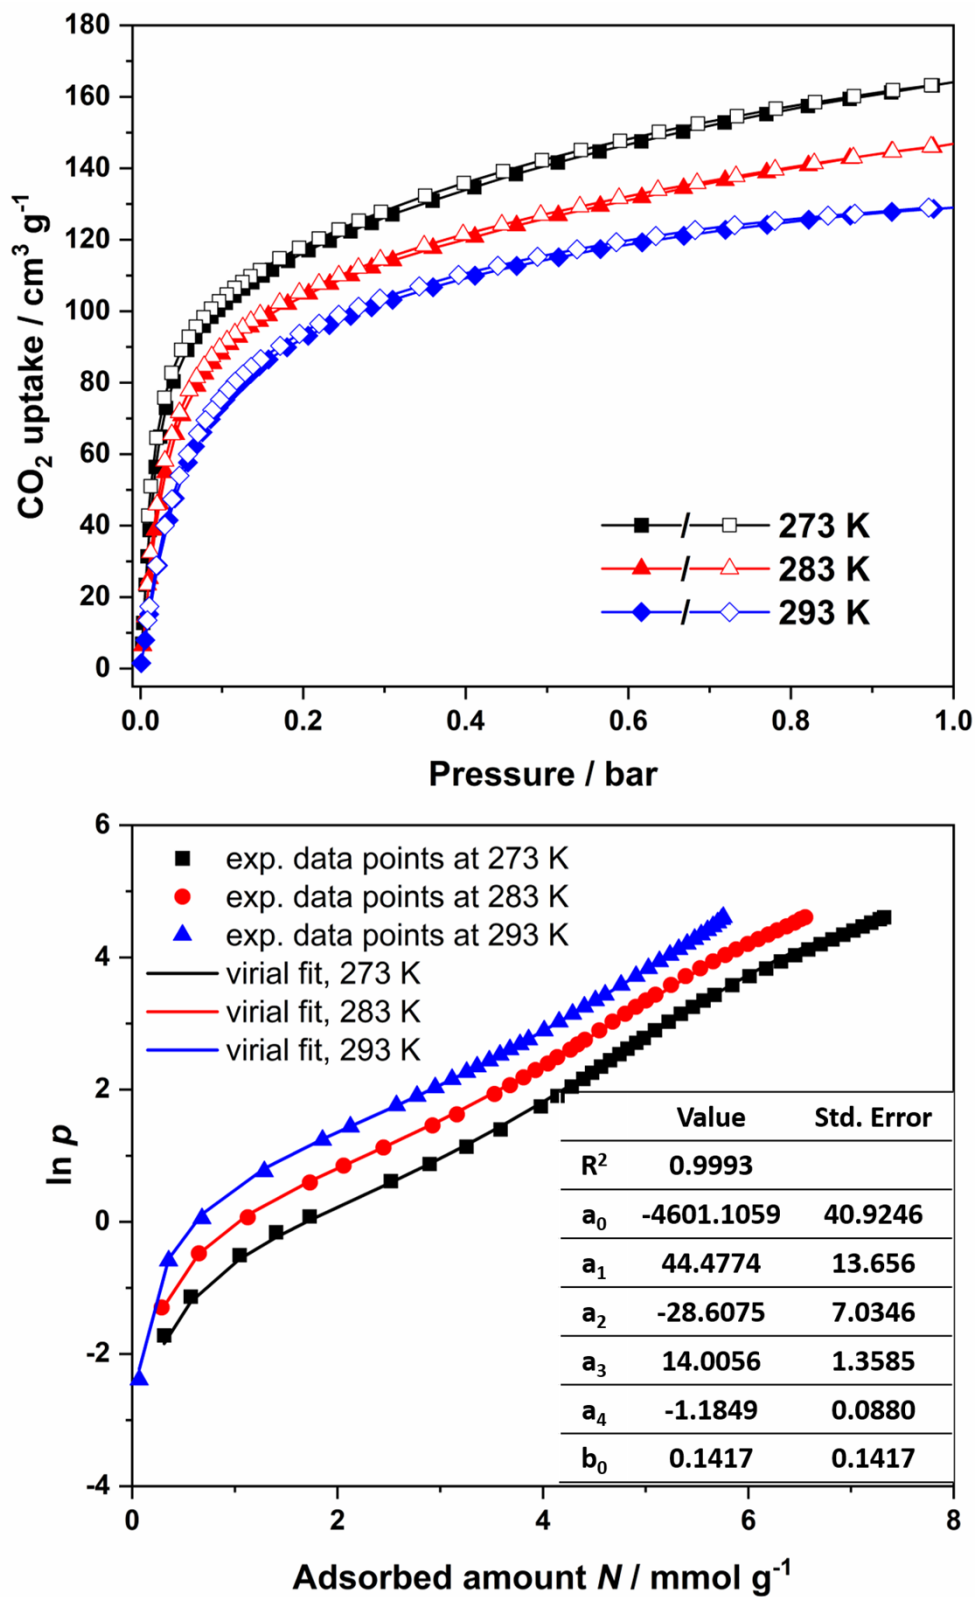

**Figure S11.** (a) CO<sub>2</sub> sorption isotherms of 5-hSA<sub>0.06</sub> recorded at 273 K, 283 K, and 293 K. (b) virial analysis of isotherms.

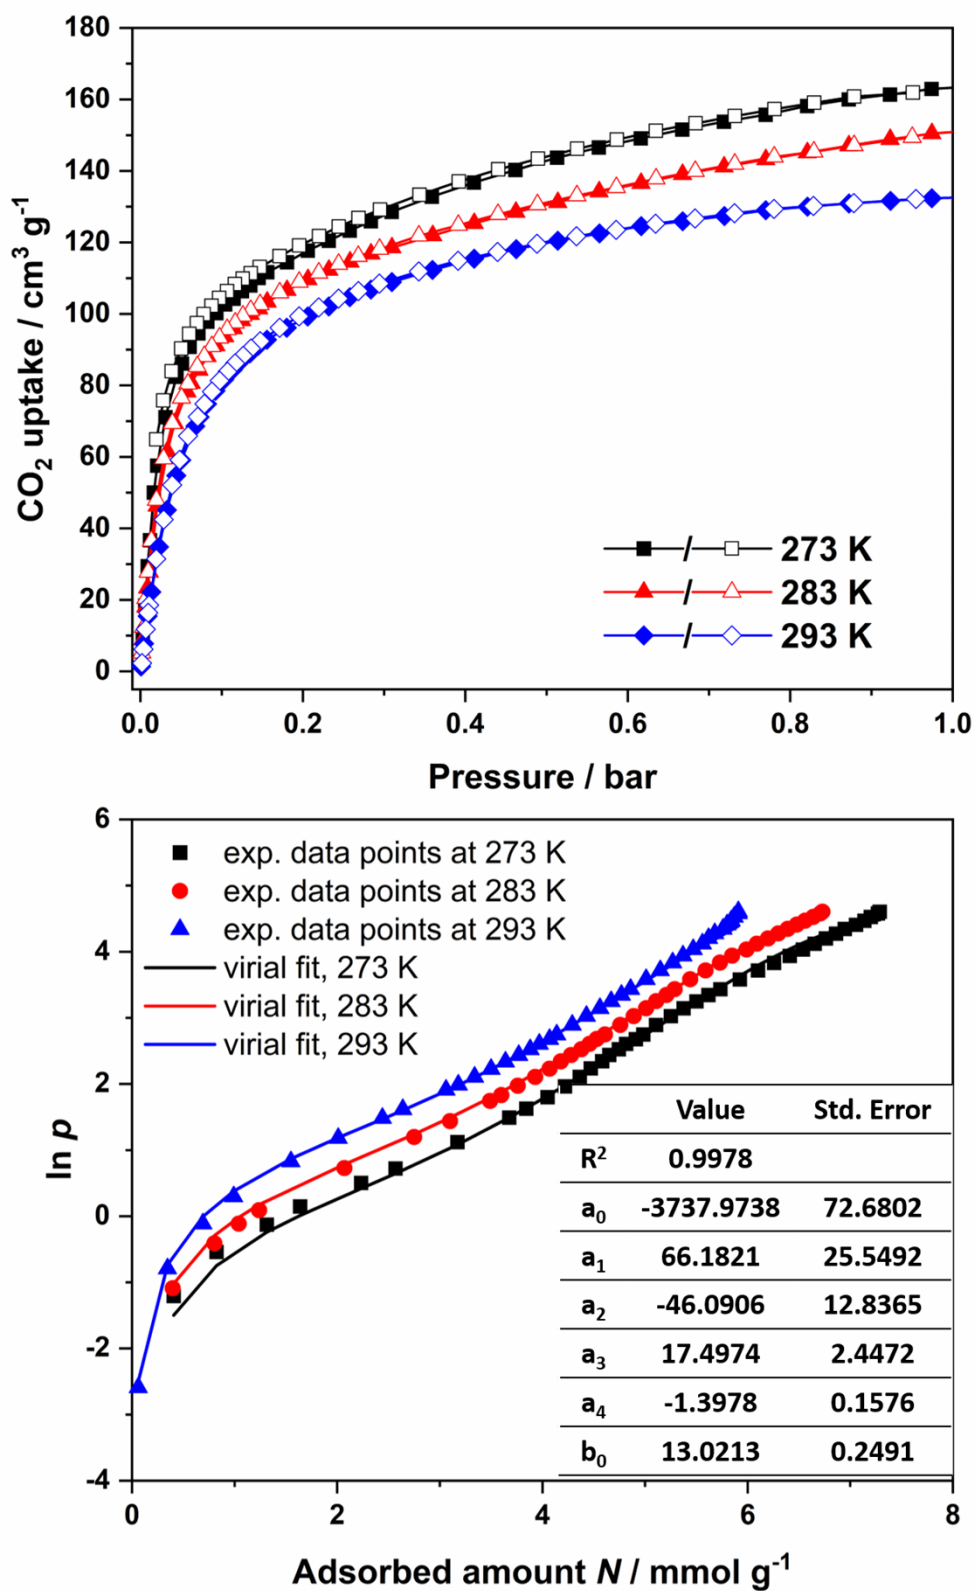

**Figure S12.** (a) CO<sub>2</sub> sorption isotherms of 2-hNA<sub>0.06</sub> recorded at 273 K, 283 K, and 293 K. (b) virial analysis of isotherms.

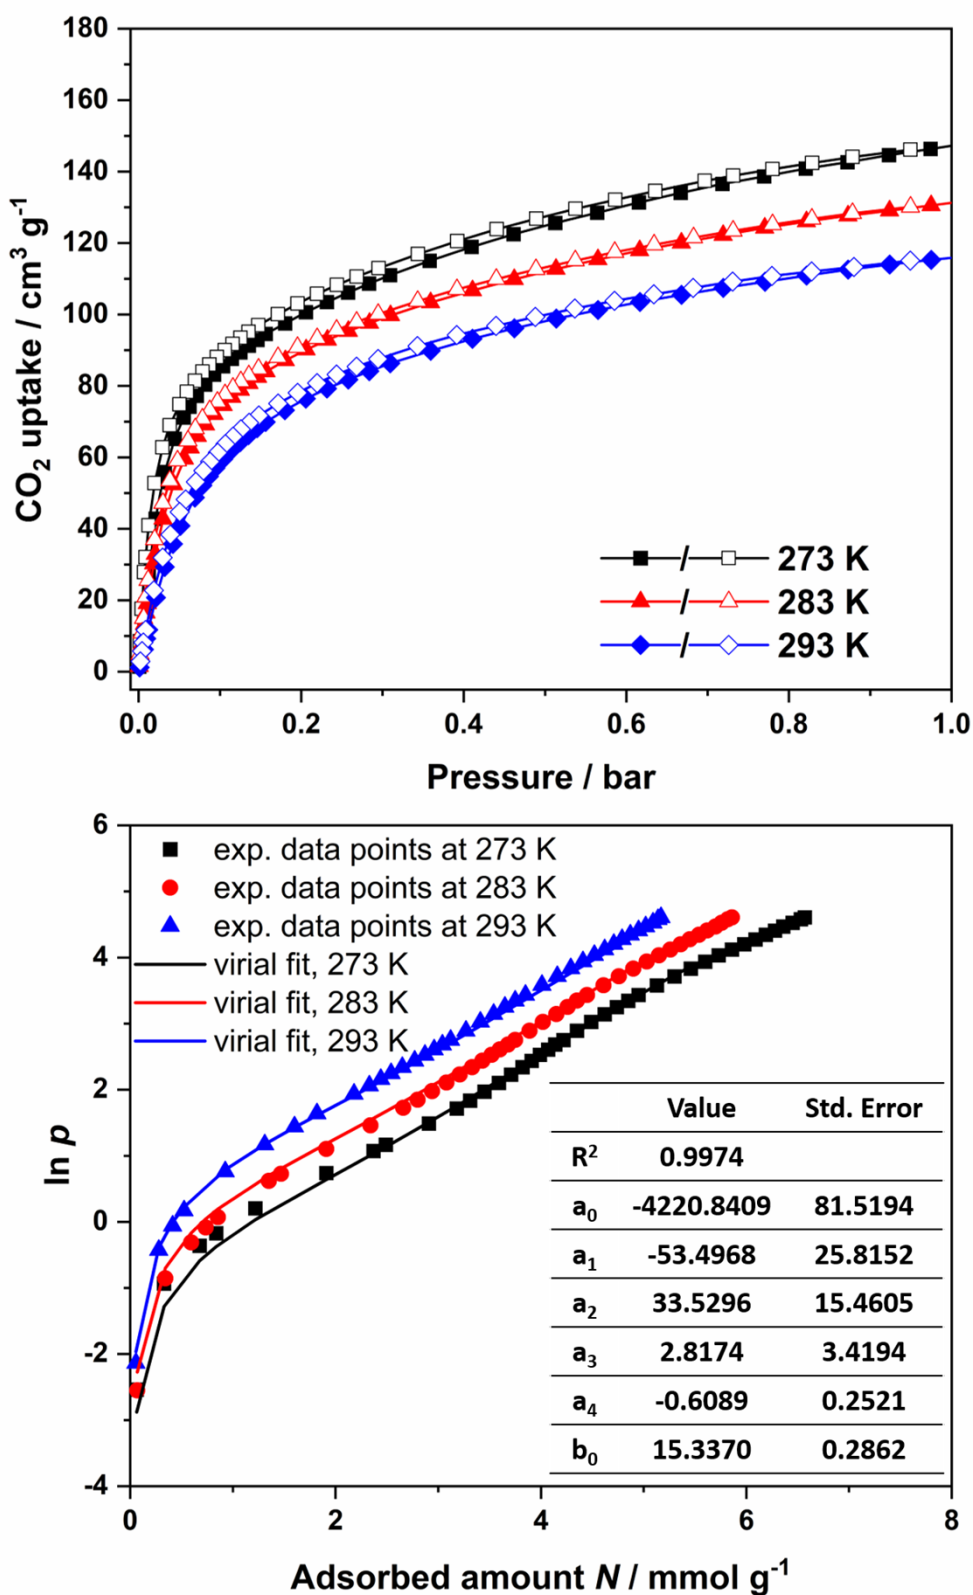

**Figure S13.** (a) CO<sub>2</sub> sorption isotherms of 5-hBImCA<sub>0.12</sub> recorded at 273 K, 283 K, and 293 K. (b) virial analysis of isotherms.



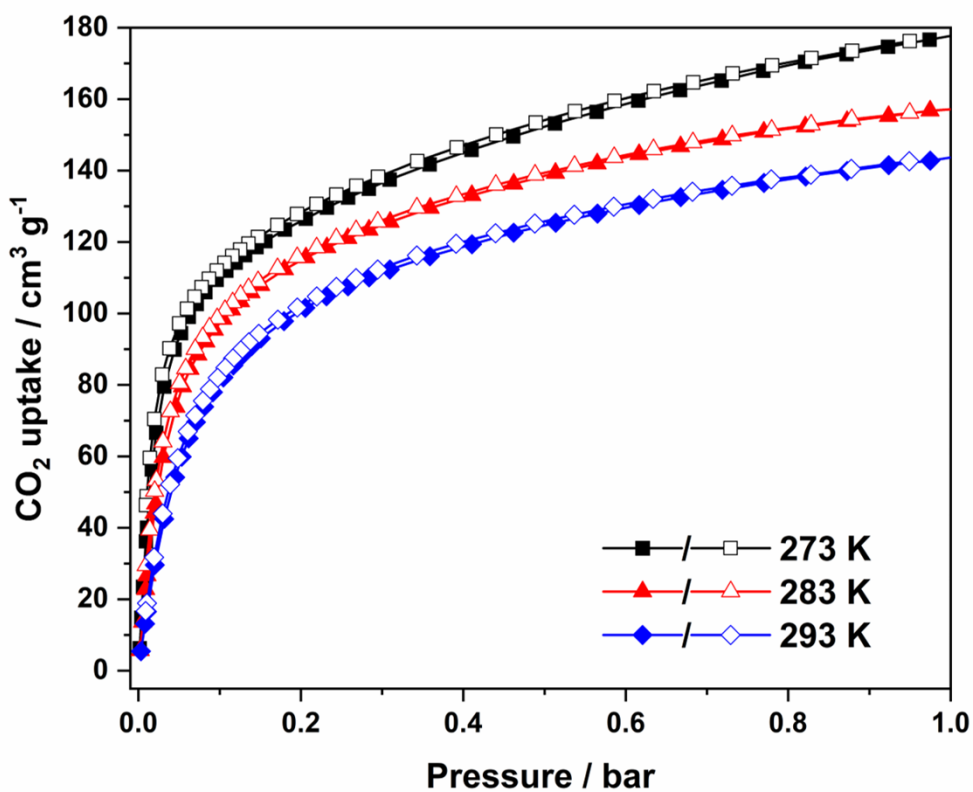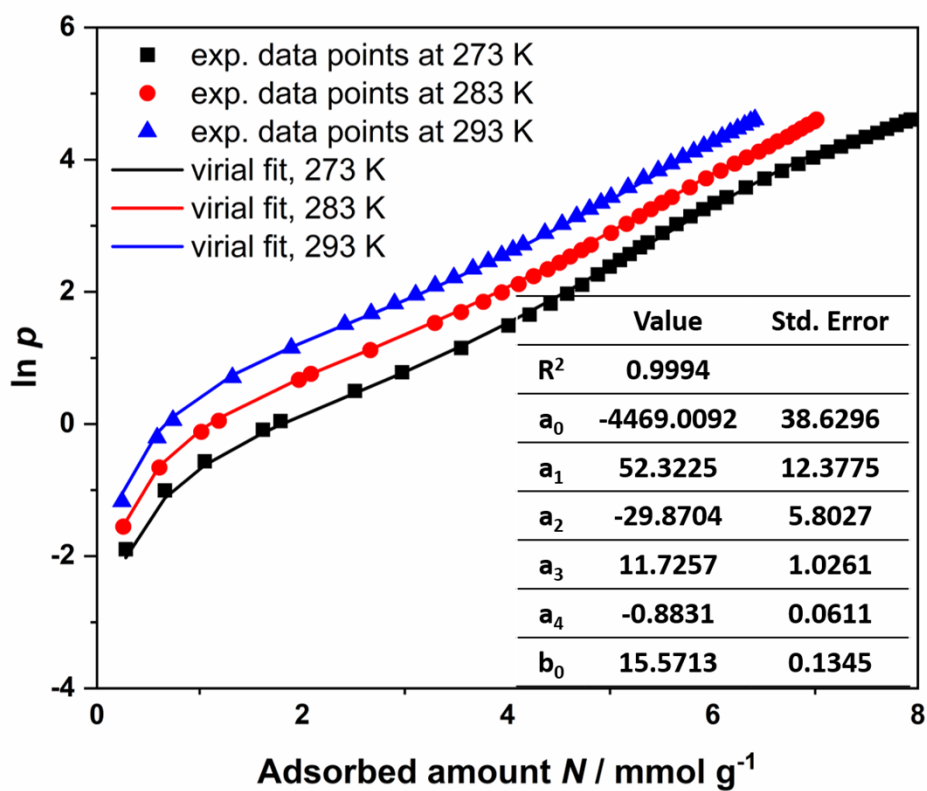

**Figure S14.** (a)  $\text{CO}_2$  sorption isotherms of defect-free Ni-MOF-74 recorded at 273 K, 283 K, and 293 K. (b) virial analysis of isotherms.

**Table S1.** Doping ratios of fragmented ligands in the defect-engineered Ni-MOF-74.

| Sample                         | Doping Linker            | Feeding ratio/% | Doped ratio/% |
|--------------------------------|--------------------------|-----------------|---------------|
| <b>5-fSA<sub>0.08</sub></b>    | H <sub>2</sub> -5-fSA    | 10              | 8             |
| <b>5-fSA<sub>0.21</sub></b>    | H <sub>2</sub> -5-fSA    | 30              | 21            |
| <b>5-fSA<sub>0.39</sub></b>    | H <sub>2</sub> -5-fSA    | 50              | 39            |
| <b>3-hSA<sub>0.06</sub></b>    | H <sub>2</sub> -3-hSA    | 10              | 6             |
| <b>3-hSA<sub>0.21</sub></b>    | H <sub>2</sub> -3-hSA    | 30              | 21            |
| <b>3-hSA<sub>0.41</sub></b>    | H <sub>2</sub> -3-hSA    | 50              | 41            |
| <b>2-hNA<sub>0.06</sub></b>    | H <sub>2</sub> -2-hNA    | 10              | 6             |
| <b>2-hNA<sub>0.17</sub></b>    | H <sub>2</sub> -2-hNA    | 30              | 17            |
| <b>2-hNA<sub>0.29</sub></b>    | H <sub>2</sub> -2-hNA    | 50              | 29            |
| <b>5-hBImCA<sub>0.04</sub></b> | H <sub>2</sub> -5-hBImCA | 10              | 4             |
| <b>5-hBImCA<sub>0.12</sub></b> | H <sub>2</sub> -5-hBImCA | 30              | 12            |
| <b>5-hBImCA<sub>0.20</sub></b> | H <sub>2</sub> -5-hBImCA | 50              | 20            |

**Table S2.** BET surface areas and pore volumes of defect-engineered Ni-MOF-74.

| Sample                         | BET/m <sup>2</sup> g <sup>-1</sup> | Pore volume/cm <sup>3</sup> g <sup>-1</sup> |
|--------------------------------|------------------------------------|---------------------------------------------|
| <b>5-fSA<sub>0.08</sub></b>    | 1325                               | 0.586                                       |
| <b>5-fSA<sub>0.21</sub></b>    | 1209                               | 0.670                                       |
| <b>5-fSA<sub>0.39</sub></b>    | 894                                | 0.517                                       |
| <b>3-hSA<sub>0.06</sub></b>    | 1323                               | 0.608                                       |
| <b>3-hSA<sub>0.21</sub></b>    | 1042                               | 0.607                                       |
| <b>3-hSA<sub>0.41</sub></b>    | 640                                | 0.456                                       |
| <b>2-hNA<sub>0.06</sub></b>    | 1325                               | 0.575                                       |
| <b>2-hNA<sub>0.17</sub></b>    | 1156                               | 0.550                                       |
| <b>2-hNA<sub>0.29</sub></b>    | 934                                | 0.570                                       |
| <b>5-hBImCA<sub>0.04</sub></b> | 1196                               | 0.539                                       |
| <b>5-hBImCA<sub>0.12</sub></b> | 1189                               | 0.514                                       |
| <b>5-hBImCA<sub>0.20</sub></b> | 1038                               | 0.486                                       |

## Supplementary Reference

S1. A. Nuhnen and C. Janiak, *Dalton Trans.*, 2020, **49**, 10295–10307.
